# Supplementary material for: TDP43 aggregation at ER-exit sites impairs ER-to-Golgi transport
Source: PubMed Central journal article supplement — Nat Commun. 2024 Oct 19;15:9026. doi: 10.1038/s41467-024-52706-7 (PMC11489672; doi:10.1038/s41467-024-52706-7), 2024-10-19
Supplement: 41467_2024_52706_MOESM1_ESM.pdf [file 41467_2024_52706_MOESM1_ESM.pdf]

# Supplementary Information

## TDP43 aggregation at ER-exit sites impairs ER-to-Golgi transport

Hongyi Wu<sup>1</sup>, Loo Chien Wang<sup>2</sup>, Belle M. Sow<sup>1</sup>, Damien Leow<sup>3</sup>, Jin Zhu<sup>1</sup>, Kathryn M. Gallo<sup>4, 5</sup>, Kathleen Wilsbach<sup>4, 5</sup>, Roshni Gupta<sup>1</sup>, Lyle W. Ostrow<sup>4, 5, \*</sup>, Crystal J. J. Yeo<sup>6-9, \*</sup>, Radoslaw M. Sobota<sup>2, \*</sup>, Rong Li<sup>1, 10, 11, \*</sup>

<sup>1</sup> Mechanobiology Institute, National University of Singapore (NUS), Singapore

<sup>2</sup> Functional Proteomics Laboratory, SingMass National Laboratory, Institute of Molecular and Cell Biology, Agency for Science, Technology and Research (A\*STAR), Singapore

<sup>3</sup> Department of Anatomy, Yong Loo-Lin School of Medicine, National University of Singapore, Singapore

<sup>4</sup> Department of Neurology, School of Medicine, Johns Hopkins University, USA

<sup>5</sup> Department of Neurology, Lewis Katz School of Medicine, Temple University, USA

<sup>6</sup> National Neuroscience Institute, A\*STAR, and Duke-NUS Medical School, Singapore

<sup>7</sup> Lee Kong Chian School of Medicine, Nanyang Technological University, Singapore

<sup>8</sup> Department of Neurology, Feinberg School of Medicine, Northwestern University, USA

<sup>9</sup> School of Medicine, Medical Sciences and Nutrition, University of Aberdeen, UK

<sup>10</sup> Department of Biological Sciences, National University of Singapore, Singapore

<sup>11</sup> Lead contact: mbihead@nus.edu.sg

\* Correspondence

# 1 Supplementary Figure Legends

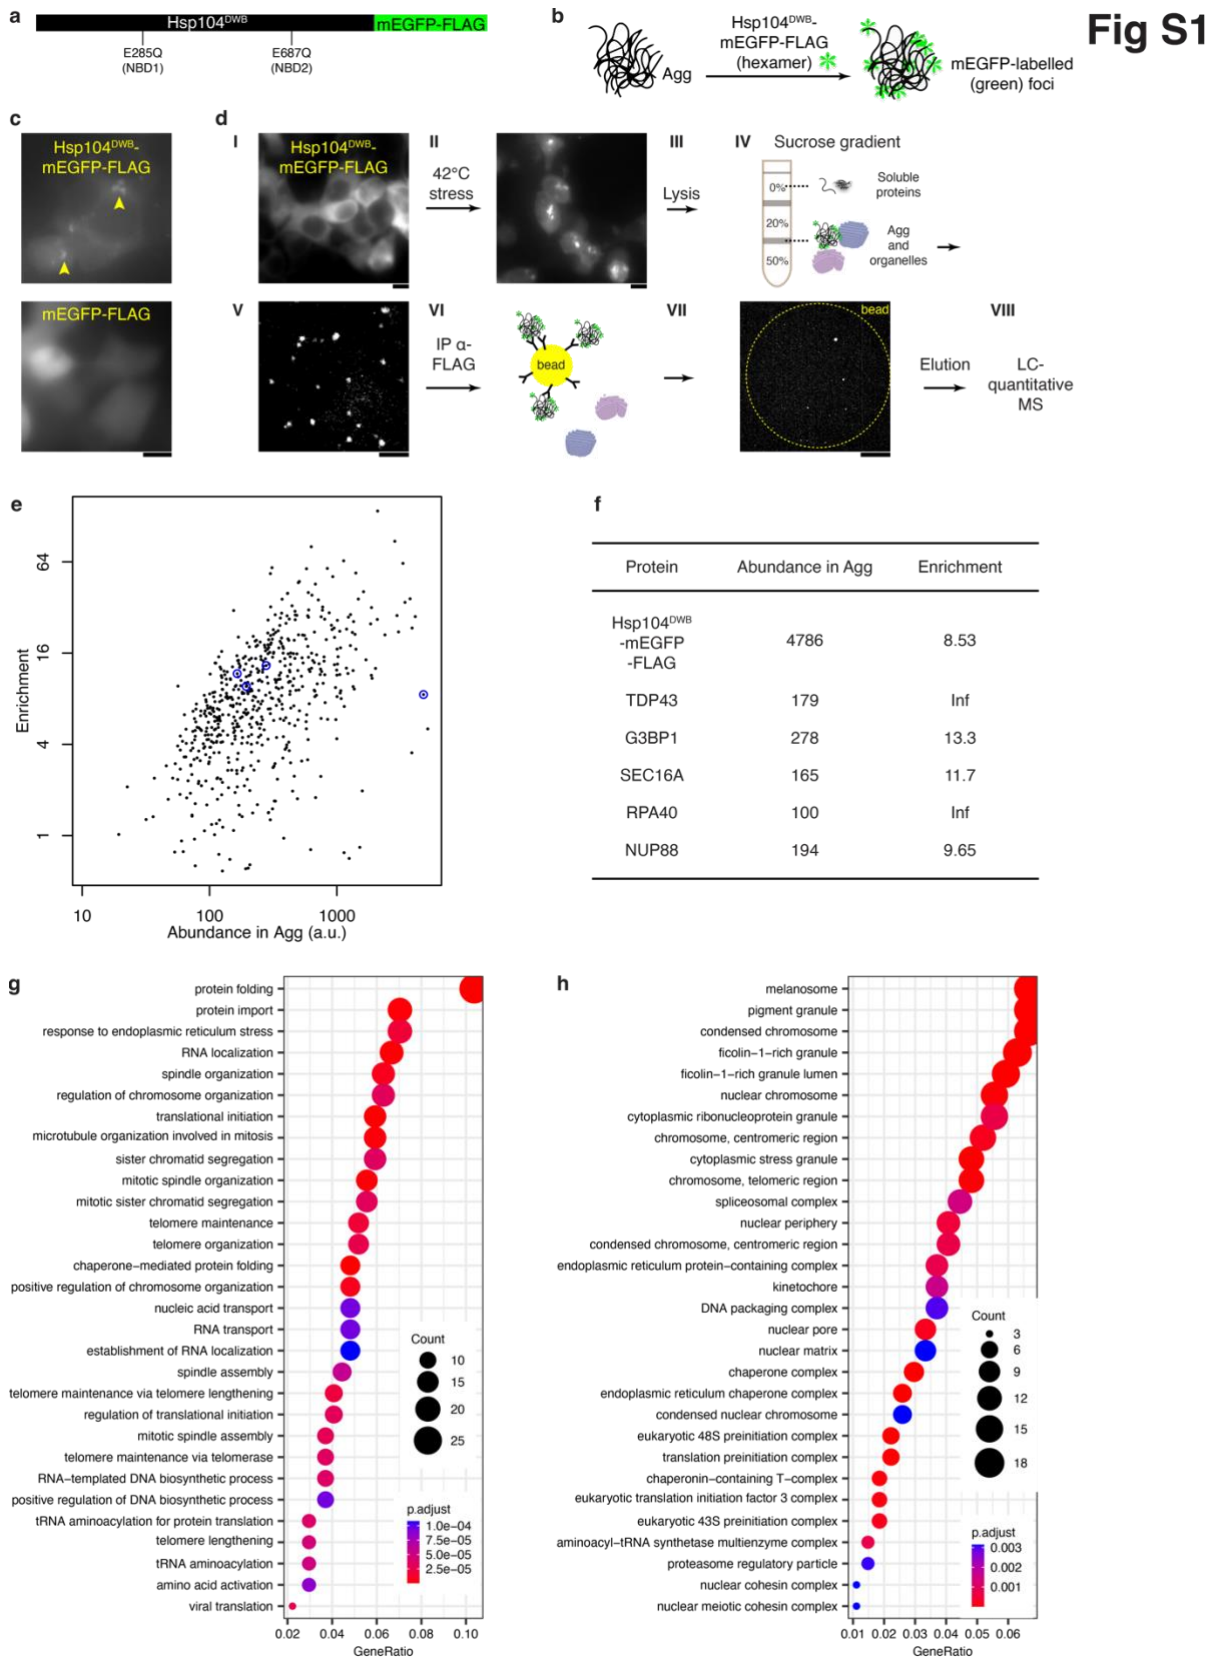

2  
3

1 **Supplementary Fig. 1. Hsp104<sup>DWB</sup> enables affinity-based aggregate**  
2 **purification.**

3 (a) Schematic diagram of Hsp104<sup>DWB</sup>-mEGFP-FLAG showing the locations of double  
4 Walker B (DWB) mutations in both nucleotide binding domains (NBDs). (b) Working  
5 scheme of aggregate labelling. Multiple Hsp104<sup>DWB</sup>-mEGFP hexamers bind misfolded  
6 proteins in aggregates but not release to form bright foci. (c) Representative images  
7 of Hsp104<sup>DWB</sup>-mEGFP-FLAG and mEGFP-FLAG expressed in HEK293T cells  
8 incubated for 12-16 hr at 42°C. Arrowheads indicate Hsp104<sup>DWB</sup>-labelled aggregates.  
9 Each scale bar represents 10 µm. (d) Workflow of protein aggregate purification by  
10 sucrose gradient centrifugation and immunoprecipitation. (I) HEK293T cells  
11 transfected with Hsp104<sup>DWB</sup>-mEGFP-FLAG were (II) heat stressed at 42°C for 12 hr  
12 and (III) lysed by RIPA buffer. (IV and V) The lysate was fractionated by sucrose  
13 gradient centrifugation to enrich protein aggregates at the interface between 20% and  
14 50% [w/v] sucrose layers. (VI and VII) Then Hsp104<sup>DWB</sup>-bound aggregates were  
15 immunoprecipitated (IP) using anti-FLAG beads and (VIII) sent for liquid  
16 chromatography (LC)-quantitative mass-spectrometry (MS). Aggregates were imaged  
17 by Hsp104<sup>DWB</sup>-mEGFP-FLAG fluorescence at the various steps. The images in (I) and  
18 (II) were captured by a widefield epifluorescence microscope whereas (IV) and (VII)  
19 are the max intensity projections of confocal z-stacks. Each scale bar represents 10  
20 µm. The yellow dashed circle in (VII) demarcates an anti-FLAG bead in the  
21 transmission light channel. (e) Scatter plot showing the abundance of MS-identified  
22 proteins in purified aggregates (plotted on a log<sub>10</sub> scale) versus fold enrichment in  
23 aggregates (*i.e.* ratio between aggregate and IP control, plotted on a log<sub>2</sub> scale). The  
24 positions of Hsp104<sup>DWB</sup>-mEGFP-FLAG and proteins later investigated are circled with  
25 values tabulated in (f). a.u.: arbitrary unit. n = 1. (f) Table showing the abundance and  
26 fold enrichment in aggregate of several proteins investigated in this study. Infinity (Inf)  
27 arose as some proteins were detected only in aggregates but not IP control. (g and h)  
28 GO analysis of the biological processes (g) and subcellular locations (h) of proteins  
29 enriched in aggregates. GeneRatio: fraction of aggregate proteins annotated in the  
30 respective GO term; Count: number of aggregate proteins annotated in the respective  
31 term; p.adjust: adjusted p-value of hypergeometric test.

**Fig S2**

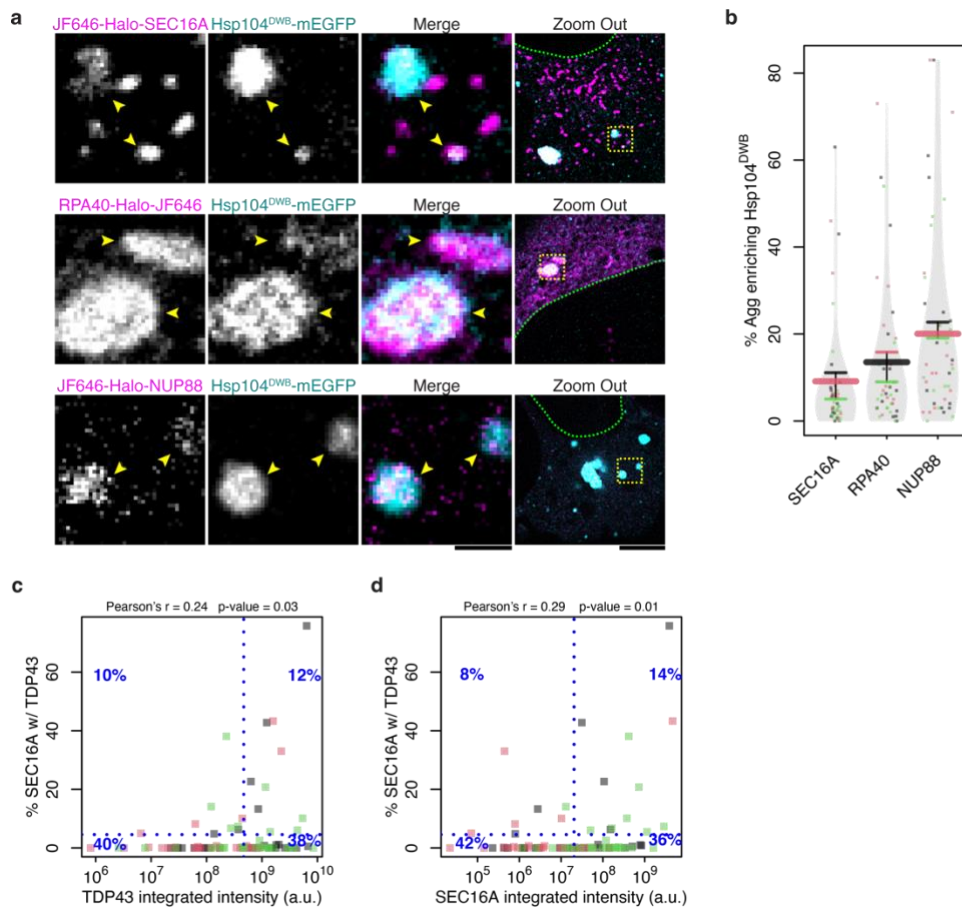

1

2 **Supplementary Fig. 2. HSP104<sup>DWB</sup>-labelled aggregates in HEK293T and**  
 3 **correlation analysis of TDP43/SEC16A co-aggregation with expression levels.**

4 (a) Representative images of aggregates formed by RPA40, SEC16A and NUP88 and  
 5 their colocalization with Hsp104<sup>DWB</sup>. Similar to Fig. 1g, h, but in HEK293T cells  
 6 stressed at 42°C for 12-16 hr. Arrowheads: Hsp104<sup>DWB</sup>-labelled aggregates; yellow  
 7 boxes in “Zoom Out”: regions displayed in zoom-in views; green dashes: the nuclei.  
 8 Scale bars except in “Zoom Out” represent 1  $\mu\text{m}$ , and represent 5  $\mu\text{m}$  in “Zoom Out”.  
 9 (b) Quantification of the experiments as in (a) showing the percentage of RPA40,  
 10 SEC16A and NUP88 aggregates labelled by Hsp104<sup>DWB</sup> in each cell.  $n = 45$  cells  
 11 examined over 3 independent experiments. The values of individual cells are plotted  
 12 as dots, and the mean values of cells in the same experiment as horizontal segments,  
 13 the median of which is elongated and thickened. Different colors denote different  
 14 experiments. (c and d) Pearson correlation analysis on the relationship between the  
 15 percentage of SEC16A inclusions that enriched for TDP43 and TDP43 (c) or SEC16A  
 16 (d) expression.  $n = 90$  cells examined over 3 independent experiments. Each dot  
 17 represents one cell, and different colors denote different experiments. The blue

- 1 vertical dashes mark the median intensities of TDP43 or SEC16A among cells and the
- 2 horizontal dashes mark the average co-aggregation level. The percentages of cells
- 3 that fall into each quadrant are shown.
- 4

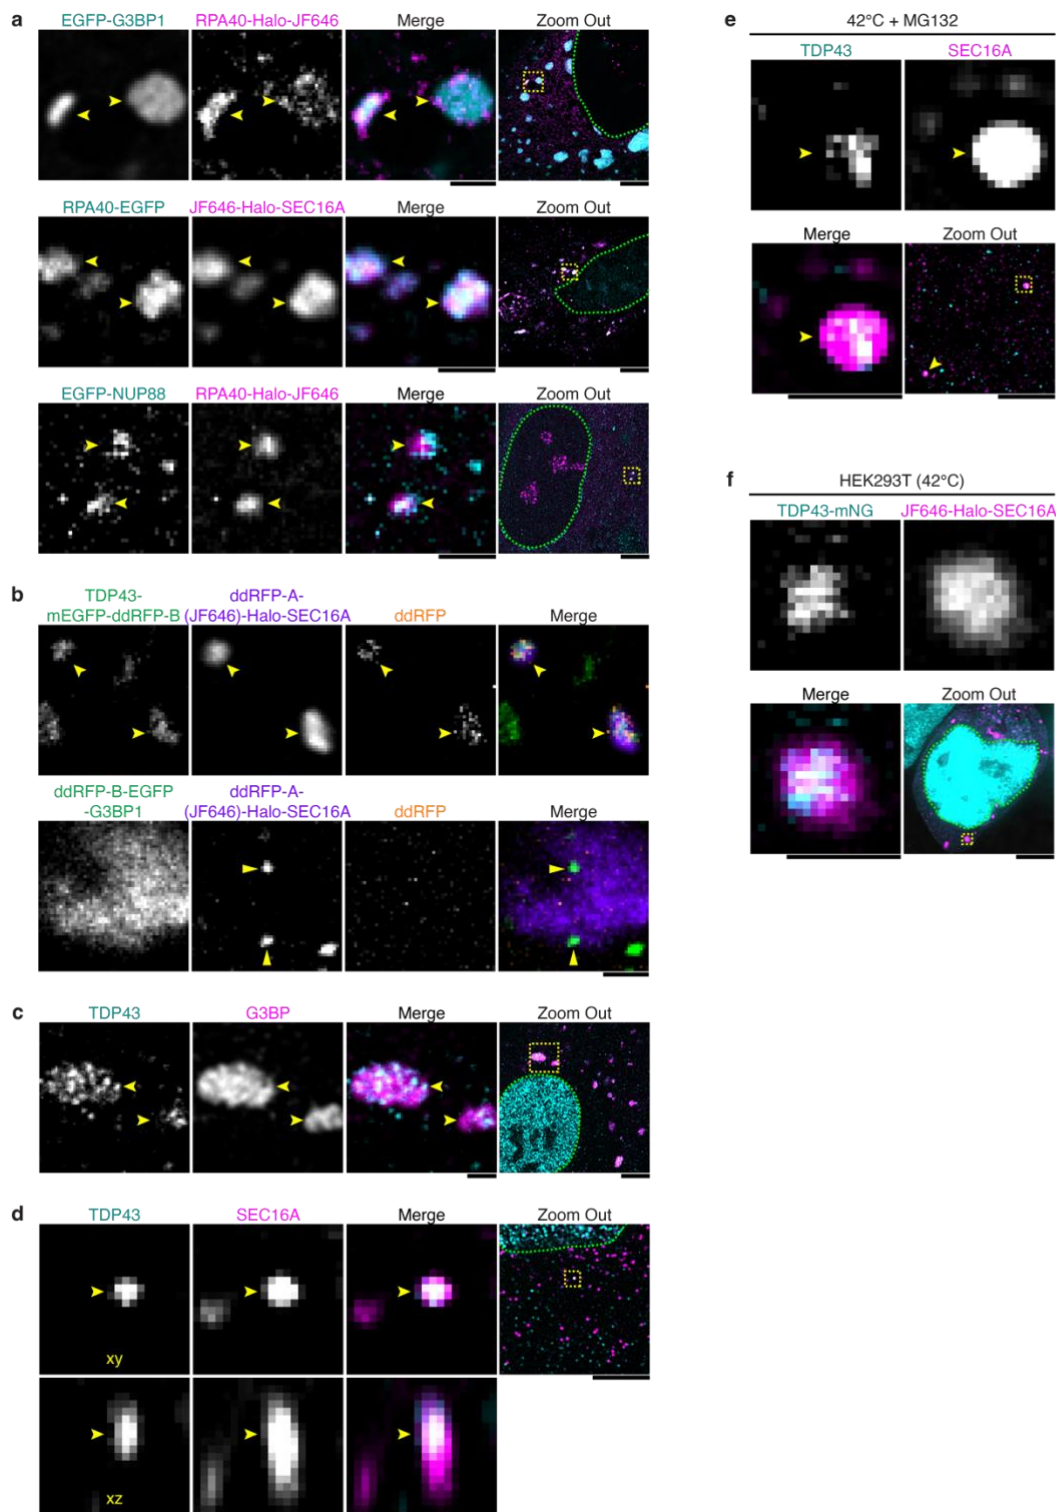

**Fig S3**

1

2 **Supplementary Fig. 3. Proteins co-aggregate with selective partners.**

3 (a) Representative images of the colocalization between RPA40 aggregates and  
 4 aggregates formed by G3BP1, SEC16A or NUP88. Arrowheads: co-aggregates;  
 5 yellow boxes in “Zoom Out”: regions displayed in zoom-in views; green dashes: the  
 6 nuclei. The quantification is shown in Fig. 2h. Scale bars except in “Zoom Out”

1 represent 1  $\mu\text{m}$ , and represent 5  $\mu\text{m}$  in “Zoom Out”. **(b)** Representative images of  
2 ddRFP-based protein interaction assays. Displayed are different fluorescence  
3 channels of cells forming either coaggs of TDP43-mEGFP-ddRFP/ddRFP-A-Halo-  
4 SEC16A or cells with ddRFP-B-EGFP-G3BP1 aggregates and ddRFP-A-Halo-  
5 SEC16A aggregates after incubation at 42°C for 12-16 hr. Arrowheads:  
6 TDP43/SEC16A coaggs; triangles: SEC16A inclusions without TDP43. Scale bars  
7 except in “Zoom Out” represent 1  $\mu\text{m}$ , and represent 5  $\mu\text{m}$  in “Zoom Out”. **(c)**  
8 Representative images of the immunofluorescence staining of TDP43 and G3BP  
9 (G3BP1/2) in cells forming SGs after incubation at 42°C for 16 hr. Scale bars except  
10 in “Zoom Out” represent 1  $\mu\text{m}$ , and represent 5  $\mu\text{m}$  in “Zoom Out”. **(d)** Representative  
11 images of the immunofluorescence staining of TDP43 and SEC16A in cells forming  
12 coaggs after incubation at 42°C for 12-16 hr. Scale bars except in “Zoom Out”  
13 represent 1  $\mu\text{m}$ , and represent 5  $\mu\text{m}$  in “Zoom Out”. **(e)** Representative images of the  
14 immunofluorescence staining of TDP43 and SEC16A in cells treated with 10  $\mu\text{M}$   
15 MG132 and incubated for 12-16 hr at 42°C. Scale bars except in “Zoom Out” represent  
16 1  $\mu\text{m}$ , and represent 5  $\mu\text{m}$  in “Zoom Out”. **(f)** Representative images of  
17 TDP43/SEC16A coaggs formed in HEK293T cells after incubation for 12-16 hr at 42°C.  
18 Scale bars except in “Zoom Out” represent 1  $\mu\text{m}$ , and represent 5  $\mu\text{m}$  in “Zoom Out”.

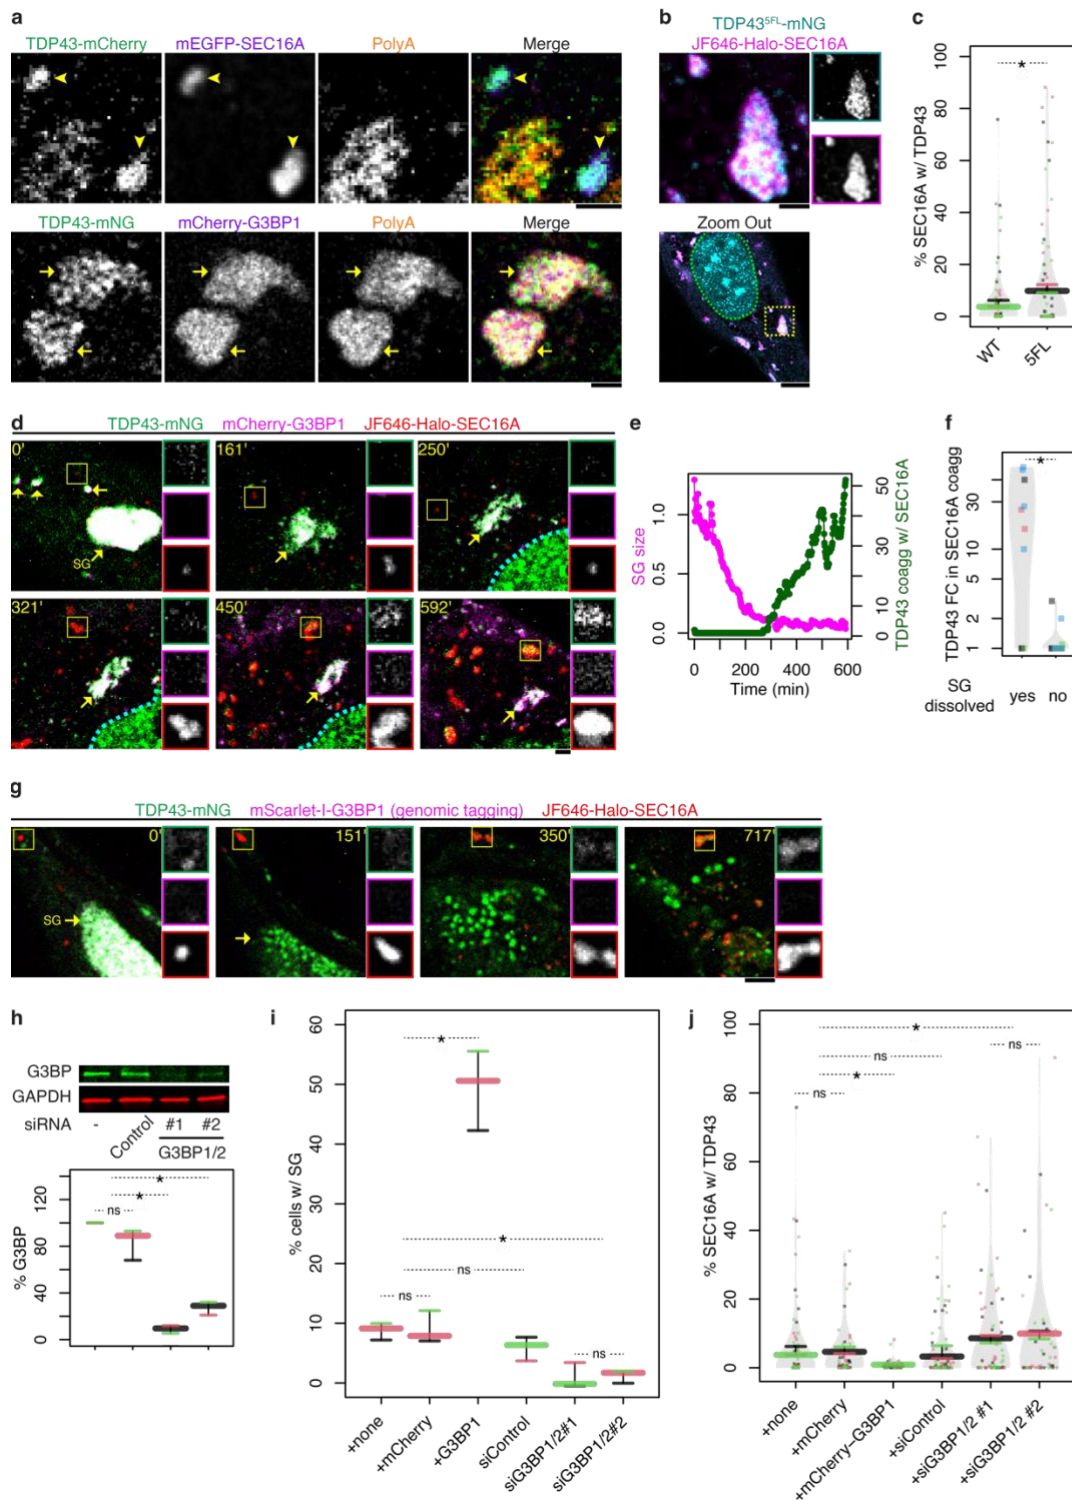

1

2 **Supplementary Fig. 4. TDP43 partitions dynamically between SGs and co-**  
 3 **aggregates with SEC16A.**

4 (a) Representative images showing fluorescence in-situ hybridization (FISH) staining  
 5 of polyA RNAs in cells containing TDP43/SEC16A coaggs (indicated by arrowheads)  
 6 or SGs (indicated by arrows). PolyA RNAs were probed by oligo(dT)<sub>30</sub> conjugated to  
 7 AF647. Each scale bar represents 1 μm. (b) Representative images showing SEC16A



1 co-aggregation with TDP43<sup>5FL</sup>. In “Zoom out”, the yellow box marks the region shown  
2 in zoom-in views, and green dashes demarcate the nucleus. Scale bars except in  
3 “Zoom Out” represent 1  $\mu\text{m}$ , and represent 5  $\mu\text{m}$  in “Zoom Out”. **(c)** Quantification of  
4 the volume percentage of SEC16A inclusions with wild-type (WT) TDP43 or TDP43<sup>5FL</sup>  
5 aggregation in cells that expressed either construct.  $n = 45$  cells examined over 3  
6 independent experiments. The values of individual cells are plotted as dots, and the  
7 mean values of cells in the same experiment as horizontal segments, the median of  
8 which is elongated and thickened. Different colors denote different experiments. The  
9 asterisk stands for significant ( $p\text{-value} \leq 0.05$ ) in two-sided t-test. **(d)** Selected frames  
10 from a representative timelapse recording of SGs (indicated by arrows) and SEC16A  
11 inclusions in a cell shifted to 42°C for 60 min before imaging started. Insets show  
12 individual channels of the yellow boxed regions (SEC16A inclusion). The scale bar  
13 represents 1  $\mu\text{m}$ . **(e)** Quantification of the experiment in (d) showing the relative SG  
14 size and TDP43 intensity in coaggs with SEC16A over time (normalized to their  
15 respective initial values). **(f)** Quantification of the experiments as in (d) showing the  
16 fold changes (FCs) of TDP43 in SEC16A inclusions at the end of tracking of SG-  
17 containing cells, grouped by whether SGs were dissolved to below 10% of the initial  
18 size.  $n = 20$  cells examined over 4 independent experiments. The FC of each cell was  
19 plotted as a datapoint on  $\log_{10}$  scale, and different colors denote different experiments.  
20 The asterisk stands for significant ( $p\text{-value} \leq 0.05$ ) in two-sided t-test. **(g)** Selected  
21 frames from a representative timelapse recording of SGs (indicated by arrows) and  
22 SEC16A inclusions in a cell shifted to 42°C for 60 min before imaging started. Similar  
23 to (d), but G3BP1 is not overexpressed but tagged in-frame by CRISPR/Cas. Insets  
24 show individual channels of the yellow boxed regions (SEC16A inclusion). The scale  
25 bar represents 1  $\mu\text{m}$ . **(h)** Western blot of G3BP1/2 in cells non-transfected or  
26 transfected with non-targeting (control) siRNA or different combinations of siRNAs  
27 against G3BP1 and G3BP2. Upper: representative blot; lower: quantification.  $n = 3$   
28 independent experiments. G3BP abundances in each experiment were calculated as  
29 percentage relative to that of untreated cells and plotted as horizontal segments.  
30 Asterisks and “ns” respectively stand for significant ( $p\text{-value} \leq 0.05$ ) and non-  
31 significant ( $p\text{-value} > 0.05$ ) in two-sided t-tests. **(i and j)** Quantification of the  
32 percentage of cells forming SGs (i) and the volume percentage of SEC16A inclusions  
33 with TDP43 aggregation (j) after incubation at 42°C for 12-16 hr. Cells were either  
34 transfected with TDP43-mNG and Halo-SEC16A only or additionally with mCherry,

1 mCherry-G3BP1, negative control siRNA, or different combinations of siRNAs against  
2 G3BP1 and G3BP2. SGs were stained by using FISH against polyA RNAs as in (a). n  
3 = 45 cells examined over 3 independent experiments. The values of individual cells  
4 are plotted as dots, and the (mean) values of cells in the same experiment as  
5 horizontal segments, the median of which is elongated and thickened. Different colors  
6 denote different experiments. Asterisks and “ns” respectively stand for significant (p-  
7 value  $\leq 0.05$ ) and non-significant (p-value  $> 0.05$ ) in two-sided t-tests.

**Fig S5**

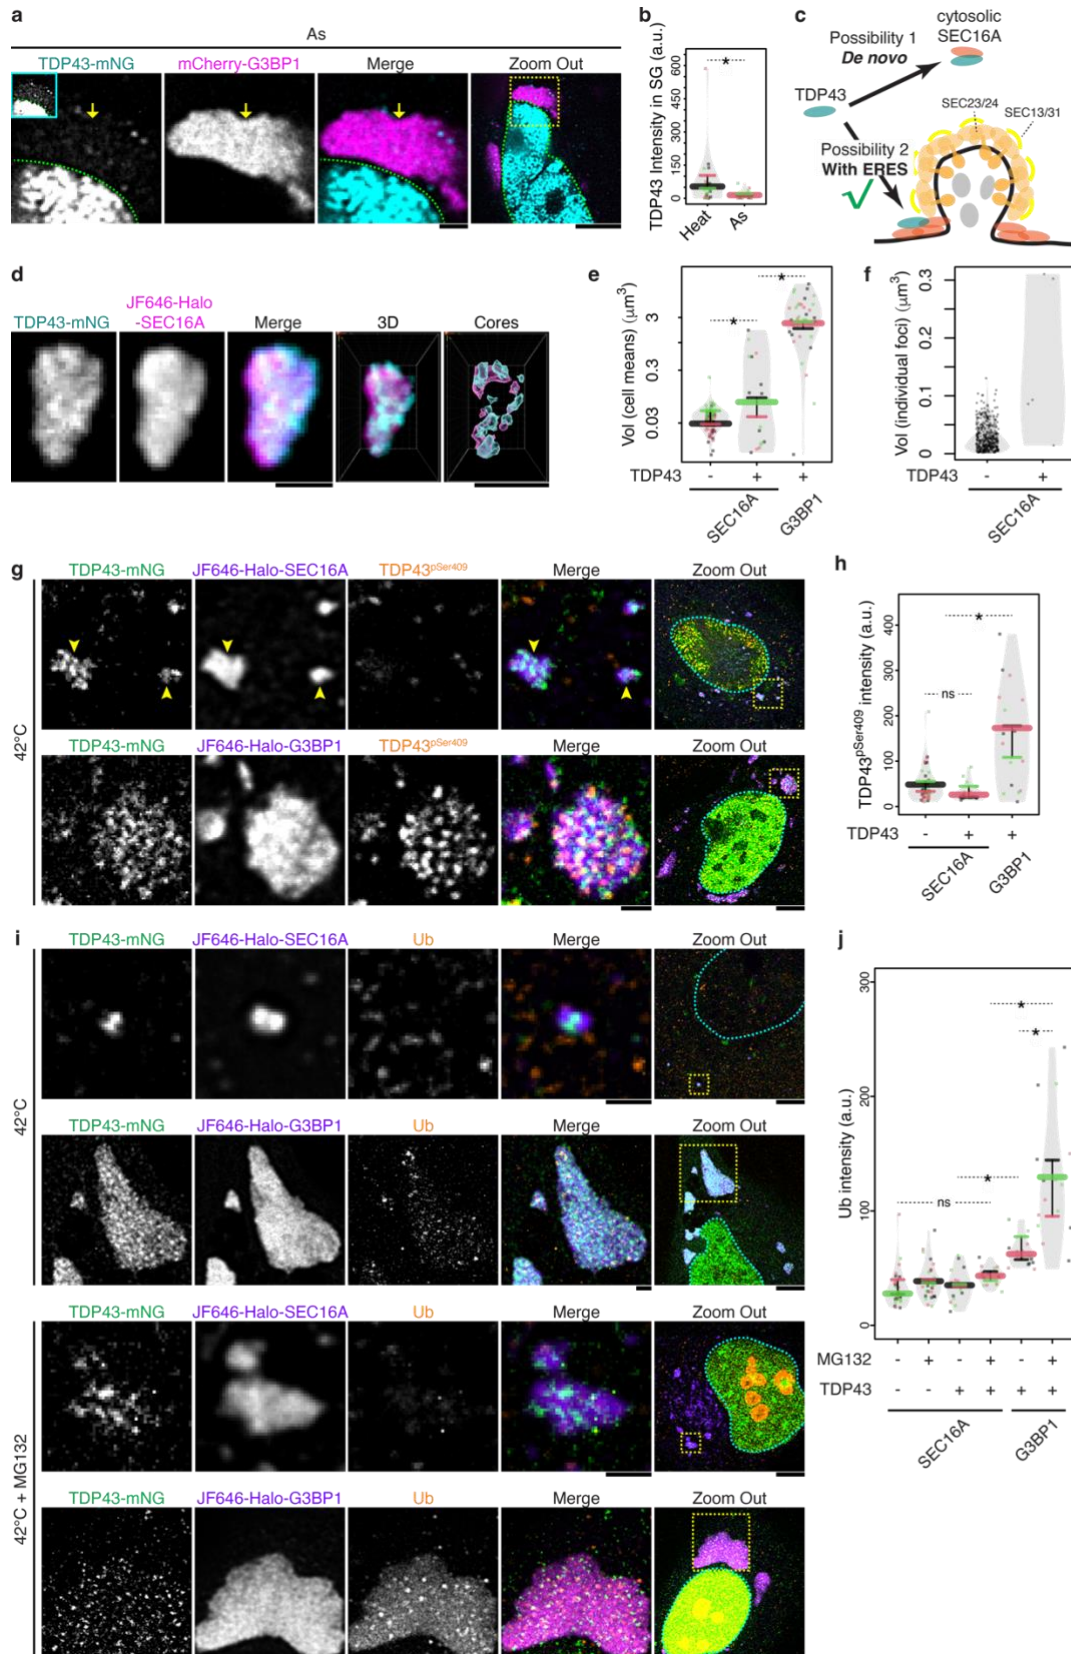

1  
2

1 **Supplementary Fig. 5. TDP43/SEC16A coaggs are not enriched for Ser409-**  
2 **phosphorylated or ubiquitinated TDP43.**

3 (a) Representative images showing that TDP43 co-aggregated with G3BP1 in stress  
4 granule (SG) formed after treatment by 0.5 mM sodium arsenite (As) for 1 hr. Arrows  
5 indicate SGs; the inset in TDP43-mNG channel shows a contrast-adjusted view; green  
6 dashes demarcate the nucleus; in “Zoom out”, the yellow box indicates the region  
7 shown in zoom-in views. Scale bars except in “Zoom Out” represent 1  $\mu\text{m}$ , and  
8 represent 5  $\mu\text{m}$  in “Zoom Out”. (b) Quantification of the experiments as in (a) and Fig.  
9 2a comparing the abundance of TDP43 in heat versus As-induced SGs. a.u.: arbitrary  
10 unit.  $n = 18$  cells examined over 3 independent experiments. The values of individual  
11 cells are plotted as dots, and the mean values of cells in the same experiment as  
12 horizontal segments, the median of which is elongated and thickened. Different colors  
13 denote different experiments. The asterisk stands for significant ( $p\text{-value} \leq 0.05$ ) in  
14 two-sided t-test. (c) Schematic diagram showing two possible ways of  
15 TDP43/SEC16A coagg formation: *de novo* from cytosolic TDP43 and SEC16A, and  
16 TDP43 co-aggregation with ERES. (d) Representative images of clusters of  
17 TDP43/SEC16A coaggs formed after 12-16 hr of incubation at 42°C. The 3D rendering  
18 shows a TDP43/SEC16A cluster viewed from top and “Cores” view annotates high  
19 intensity cores of TDP43 or SEC16A within the cluster. Each scale bar represents 1  
20  $\mu\text{m}$ . (e) Quantification of the experiments as in Fig. 2a, b comparing the volumes of  
21 SEC16A inclusions without TDP43, TDP43/SEC16A coaggs and TDP43-containing  
22 SGs. Volumes are plotted on a  $\log_{10}$  scale.  $n = 45$  cells examined over 3 independent  
23 experiments. The values of individual cells are plotted as dots, and the mean values  
24 of cells in the same experiment as horizontal segments, the median of which is  
25 elongated and thickened. Different colors denote different experiments. Asterisks and  
26 “ns” respectively stand for significant ( $p\text{-value} \leq 0.05$ ) and non-significant ( $p\text{-value} >$   
27  $0.05$ ) in two-sided t-tests. (f) Quantification of a cell with mild TDP43/SEC16A co-  
28 aggregation (Fig. 2b) showing the volumes of individual SEC16A inclusions with or  
29 without TDP43. Each data point represents a SEC16A inclusion. (g) Representative  
30 images showing immunostaining of Ser409-phosphorylated TDP43 (TDP43<sup>pSer409</sup>) in  
31 cells containing TDP43/SEC16A coaggs (indicated by arrowheads) or SGs. Scale  
32 bars except in “Zoom Out” represent 1  $\mu\text{m}$ , and represent 5  $\mu\text{m}$  in “Zoom Out”. (h)  
33 Quantification of the experiments as in (g) comparing the fluorescence intensity of

1 immunostained TDP43<sup>pSer409</sup> in TDP43/SEC16A coaggs and TDP43-containing SGs.  
2 TDP43<sup>pSer409</sup> intensity in SEC16A inclusions without TDP43 was also quantified to  
3 mark the background intensity. n = 15 cells containing each type of aggregates  
4 examined over 3 independent experiments. The values of individual cells are plotted  
5 as dots, and the mean values of cells in the same experiment as horizontal segments,  
6 the median of which is elongated and thickened. Different colors denote different  
7 experiments. The asterisks and “ns” respectively stand for significant (p-value ≤ 0.05)  
8 and non-significant (p-value > 0.05) in two-sided t-tests. (i) Representative images  
9 showing immunostaining of ubiquitin (Ub, all forms) in cells forming TDP43/SEC16A  
10 coaggs (indicated by arrowheads) or SGs after 12-16 hr of incubation at 42°C, without  
11 or with 10 μM MG132 treatment in the last 4 hr. Scale bars except in “Zoom Out”  
12 represent 1 μm, and represent 5 μm in “Zoom Out”. (j) Quantification of the  
13 experiments as in (i) comparing the fluorescence intensity of immunostained ubiquitin  
14 (Ub) in SEC16A inclusions without TDP43, TDP43/SEC16A coaggs and TDP43-  
15 containing SGs. n = 15 cells containing each type of aggregates examined over 3  
16 independent experiments. The values of individual cells are plotted as dots, and the  
17 mean values of cells in the same experiment as horizontal segments, the median of  
18 which is elongated and thickened. Different colors denote different experiments.  
19 Asterisks and “ns” respectively stand for significant (p-value ≤ 0.05) and non-  
20 significant (p-value > 0.05) in two-sided t-tests.  
21

Fig S6

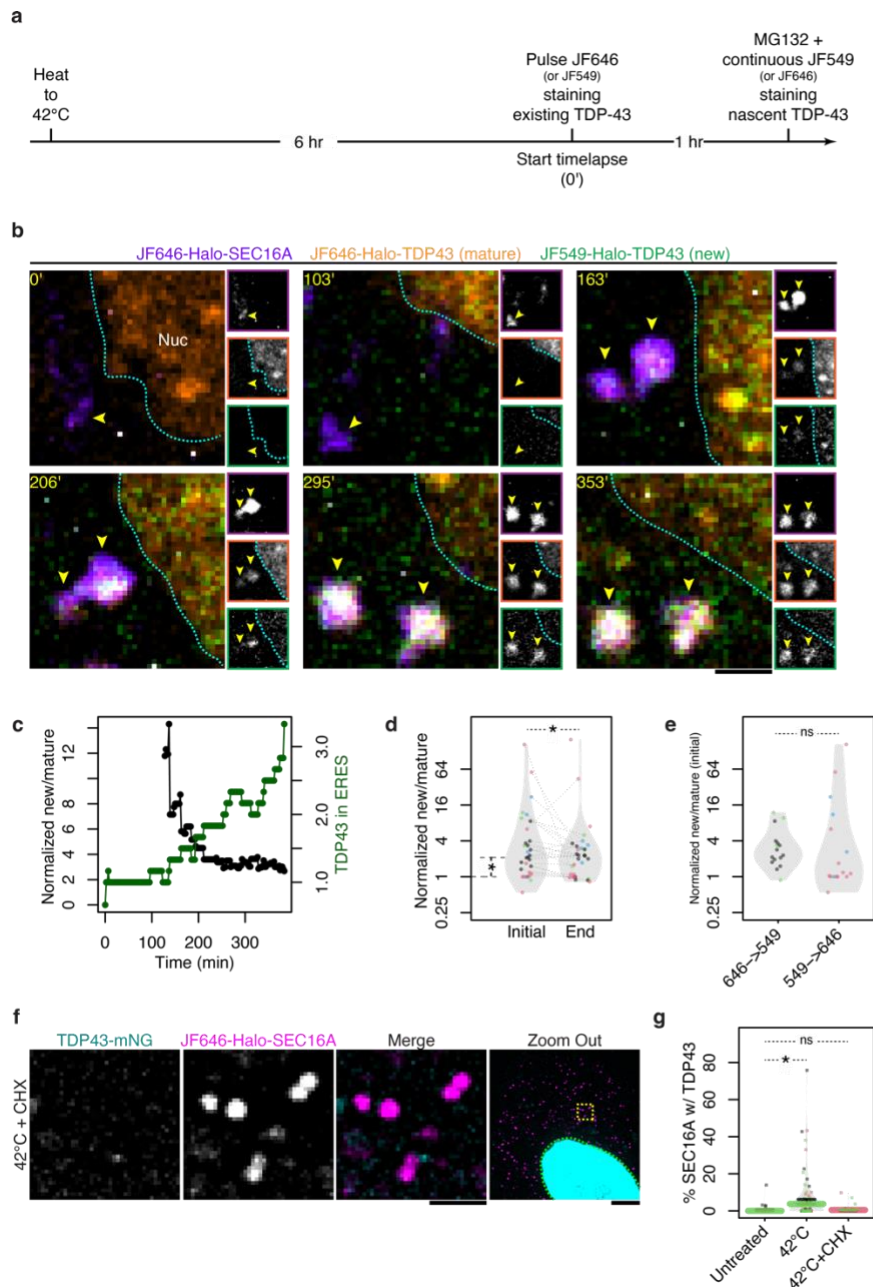

- 1
- 2 **Supplementary Fig. 6. TDP43/SEC16A coaggs are ERES enriching nascent**
- 3 **TDP43.**
- 4 (a) Workflow of the pulse-chase of Halo-TDP43. Cells pre-stressed at 42°C for 6 hr
- 5 were pulse-labelled for 30 min with the first dye, JF646 (or JF549), to visualize pre-
- 6 existing TDP43 followed by dye wash off. Then 1  $\mu$ M MG132 was used to inhibit
- 7 TDP43 degradation followed by addition of the second dye, JF549 (or JF646), to
- 8 continuously label newly synthesized TDP43. The second dye was kept in media. (b)
- 9 Selected frames from a representative Halo-TDP43 pulse-chase. Pre-existing (mature)
- 10 Halo-TDP43 was pulse-labelled by JF646 (orange) whereas newly synthesized (new)

1 Halo-TDP43 was labelled continuously with JF549 (green). mEGFP-SEC16A (purple)  
2 was used to mark ERES. Insets show individual channels. Cyan dashes demarcate  
3 the nucleus (Nuc). The scale bar represents 1  $\mu\text{m}$ . **(c)** Quantification of the experiment  
4 in (b) showing the ratio between new and mature TDP43 that aggregated in ERES,  
5 normalized to the new/mature ratio of the whole cell, over time (black curve). To  
6 indicate the time of TDP43 aggregation in ERES, the relative intensity of TDP43 in  
7 ERES (normalized to its initial value) was shown (green curve). **(d)** Quantification of  
8 the experiments as in (b) showing the normalized new/mature TDP43 ratios upon  
9 aggregate formation (initial) and at the end of cell tracking (end), plotted on a log<sub>2</sub>  
10 scale.  $n = 20$  cells with TDP43 aggregation in ERES examined over 4 independent  
11 experiments. The initial and end ratios of each cell are plotted as data points and, if  
12 the initial ratio exceeded 1, linked by gray segments. The asterisk between initial  
13 ratios and 1 indicates  $p \leq 0.05$  by one sample two-sided t-test, and the asterisk  
14 between linked initial and end ratios indicates  $p \leq 0.05$  by two-sided paired t-test. **(e)**  
15 Quantification of the experiments as in (b) showing the normalized new/mature TDP43  
16 ratios upon aggregate formation, and grouped by the order of dye addition. For each  
17 group,  $n = 10$  cells with TDP43 aggregation in ERES examined over 2 independent  
18 experiments. “ns” stands for non-significant ( $p\text{-value} > 0.05$ ) in two-sided t-test. **(f)**  
19 Representative images of cells incubated at 42°C for 16 hr with cycloheximide (CHX)  
20 addition in the last 6 hr. In “Zoom Out”, the yellow box marks the region displayed in  
21 zoom-in views, green dashes demarcate the nucleus, and the scale bar represents 5  
22  $\mu\text{m}$ . **(g)** Quantification of the experiments as in (f), Fig. 2b, 3a comparing the volume  
23 percentage of SEC16A inclusions with TDP43 aggregation in untreated cells or cells  
24 incubated at 42°C for 16 hr, without or with CHX treatment.  $n = 45$  cells examined  
25 over 3 independent experiments. The values of individual cells are plotted as dots,  
26 and the mean values of cells in the same experiment as horizontal segments, the  
27 median of which is elongated and thickened. Different colors denote different  
28 experiments. The asterisk and “ns” respectively stand for significant ( $p\text{-value} \leq 0.05$ )  
29 and non-significant ( $p\text{-value} > 0.05$ ) in two-sided t-tests.

**Fig S7**

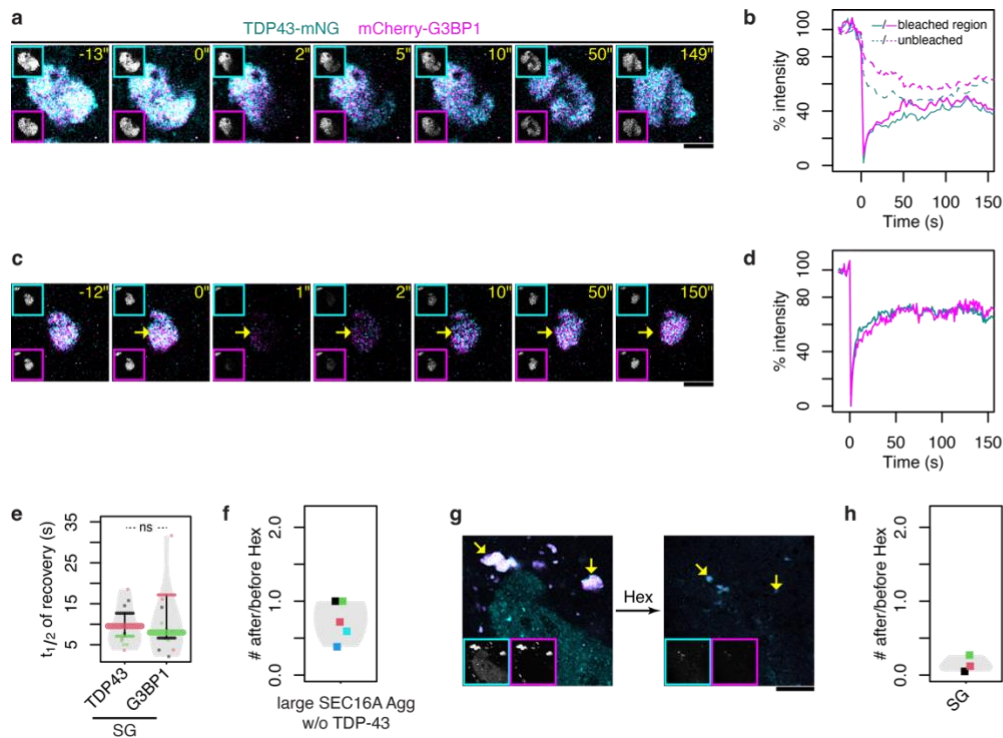

1

2 **Supplementary Fig. 7. SGs and SEC16A inclusions without TDP43 are dynamic**  
 3 **(liquid-like).**

4 (a) Selected frames from a representative timelapse recording of a TDP43/G3BP1  
 5 coagg (TDP43-containing SG) after partial photobleaching. Insets show individual  
 6 channels. The scale bar represents 1  $\mu\text{m}$ . (b) Quantification of the experiment in (a)  
 7 showing the relative intensities of TDP43 (cyan lines) and G3BP1 (magenta lines) in  
 8 bleached (solid lines) and unbleached regions (dashed lines) over time, normalized to  
 9 their respective initial intensities. (c) Selected frames from a representative timelapse  
 10 recording of a TDP43/G3BP1 coagg (SG) after photobleaching in its entirety. The  
 11 position of the SG immediately before photobleaching is indicated by an arrow. The  
 12 scale bar represents 1  $\mu\text{m}$ . (d) Quantification of the experiment in (c) showing the  
 13 relative intensities of TDP43 (cyan line) and G3BP1 (magenta line) over time,  
 14 normalized to their respective initial intensities. (e) Quantification of full-FRAP  
 15 experiments as in (c) showing the half time ( $t_{1/2}$ ) of fluorescence recovery for TDP43  
 16 and G3BP1 in SGs.  $n = 15$  SGs examined over 3 independent experiments. The  
 17 values of individual SGs are plotted as dots, and the mean values of SGs in the same  
 18 experiment as horizontal segments, the median of which is elongated and thickened.  
 19 Different colors denote different experiments. “ns” stands for non-significant ( $p\text{-value} >$   
 20  $0.05$ ) in two-sided t-test. (f) Quantification of the experiments in Fig. 4g showing the



1 after/before ratios of large ERES (of > 300 nm in radius). n = 50 cells examined over  
2 5 independent experiments. The median values of cells in the same experiments are  
3 plotted as dots. **(g)** Representative images showing SGs (indicated by arrows) in a  
4 cell before and after 3.5% [v/v] Hex treatment for 15 min. Insets show individual  
5 channels. The scale bar represents 5  $\mu$ m. **(h)** Quantification of the experiments as in  
6 (g) showing the after/before ratios of SGs. n = 30 cells examined over 3 independent  
7 experiments. The median values of cells in the same experiments are plotted as dots.  
8

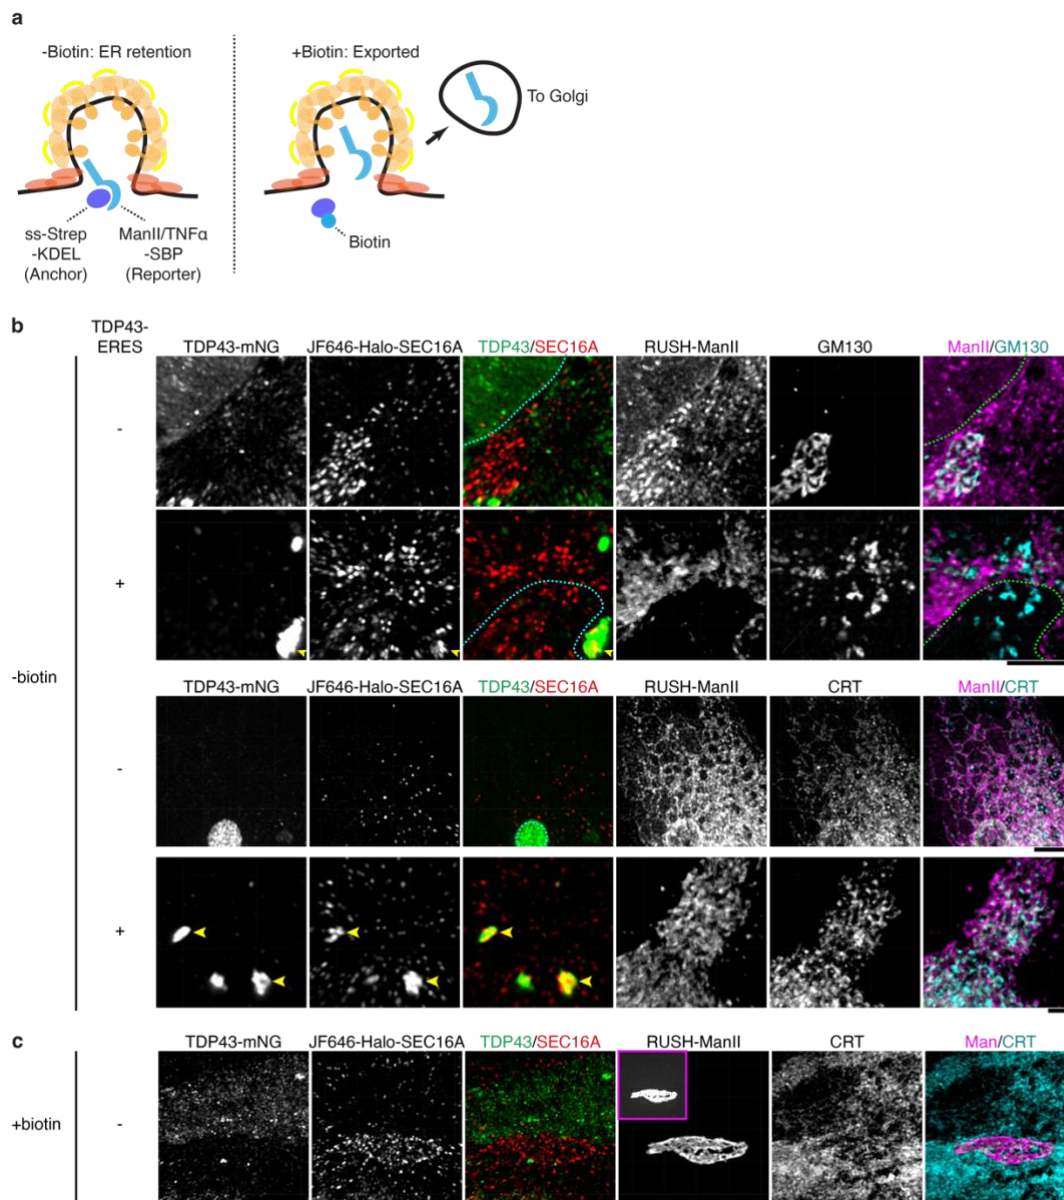

1

2 **Supplementary Fig. 8. ER-to-Golgi transport of RUSH-ManII in cells without or**  
 3 **with TDP43-ERES.**

4 (a) Working scheme of RUSH assay for examining ER-to-Golgi protein transport. Left:  
 5 when cells are cultured in biotin-free media, the RUSH reporter containing  
 6 streptavidin-binding protein (SBP) is retained in the ER or ERES through binding to  
 7 the ER anchor ss-streptavidin-KDEL; Right: after biotin supplement, the reporter is  
 8 released from anchor and subsequently exported to the Golgi. (b) Representative  
 9 images of RUSH assay in cells without or with TDP-ERES. Cells cultured in biotin-free  
 10 media was imaged with GM130 (Golgi) or Calreticulin (CRT – ER marker) co-stained  
 11 by immunofluorescence. Arrowheads: TDP43-ERES; cyan or green dashes: the nuclei.  
 12 The quantification of is shown in (Fig. 5b, c). Each scale bar represents 5 μm. (c)

1 Representative images of RUSH assay in cells without TDP-ERES and supplemented  
2 with biotin for 1 hr. CRT was co-stained to visualize the ER. The inset in the ManII  
3 channel shows a contrast-adjusted view. The scale bar represents 5  $\mu$ m.  
4

Fig S9

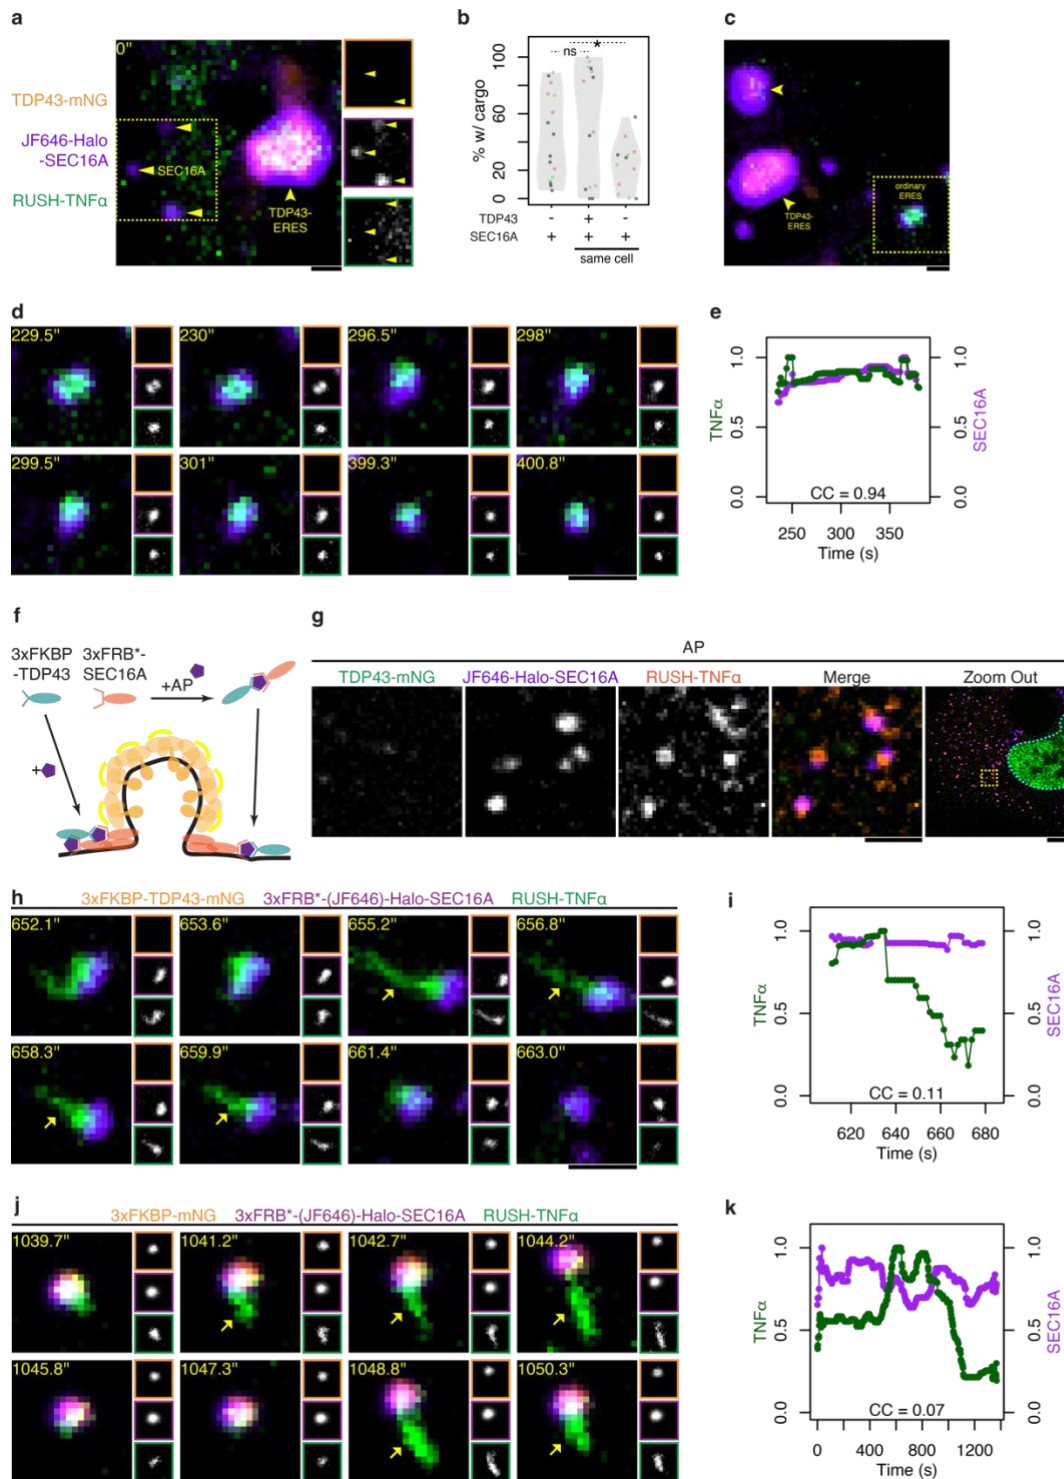

1

2 **Supplementary Fig. 9. The dominant negative effect of TDP43-ERES over**  
 3 **ordinary ERES in the same cell and control experiments for AP21967-induced**  
 4 **co-aggregation of TDP43 with ERES.**

5 (a) Zoom-out view of the TDP43-ERES (indicated by the arrowhead) in Fig. 5g  
 6 showing that SEC16A inclusions without TDP43 (indicated by triangles) in its vicinity  
 7 are devoid of RUSH-TNFα upon biotin addition (0"). Insets show individual channels

1 of the yellow boxed region. Each scale bar represents 1  $\mu\text{m}$ . **(b)** Quantification of  
2 RUSH experiments in Fig. 5e, g showing the percentage of TDP43-ERES and  
3 SEC16A inclusions without TDP43 in either the same or different cells that recruited  
4 RUSH-TNF $\alpha$ . n = 9 cells examined over 3 independent experiments. Each dot  
5 represents one cell, and different colors denote different experiments. The asterisk  
6 and “ns” respectively stand for significant (p-value  $\leq 0.05$ ) and non-significant (p-value  $>$   
7 0.05) in two-sided t-tests. **(c)** Zoom-out view of an ordinary ERES (yellow boxed region)  
8 showing TDP43-ERES nearby (indicated by arrowheads). The scale bar represents 1  
9  $\mu\text{m}$ . The timelapse recording of this ordinary ERES is shown in (d). **(d)** Selected  
10 frames of the timelapse recording of the ERES boxed in (c) during RUSH-TNF $\alpha$  assay.  
11 The scale bar represents 1  $\mu\text{m}$ . **(e)** Quantification of RUSH-TNF $\alpha$  and SEC16A  
12 intensities over time (normalized to their respective max intensities) in the TDP43-  
13 ERES tracked in (d), as in Fig. 5f. **(f)** Working scheme of AP21967-induced protein  
14 co-aggregation. TDP43 (or mNG control) and SEC16A were respectively tagged with  
15 3xFKBP and 3xFRB\*, which can be induced to heterodimerize by both binding to the  
16 rapamycin analog AP21967 (AP). As such, AP induced aggregation of 3xFKBP-  
17 TDP43 at ERES marked by 3xFRB\*-SEC16A. **(g)** Representative images of cells  
18 expressing TDP43-mNG, Halo-SEC16A and RUSH-TNF $\alpha$  and treated with AP21967  
19 for 6-10 hr. In “Zoom Out”, the yellow box marks the region displayed in zoom-in views,  
20 and cyan dashes demarcate the nucleus. Scale bars except in “Zoom Out” represent  
21 1  $\mu\text{m}$ , and represent 5  $\mu\text{m}$  in “Zoom Out”. **(h)** Selected frames of a representative  
22 timelapse recording of an ERES marked by 3xFRB\*-(JF646)-Halo-SEC16A but not  
23 3xFKBP-TDP43-mNG during RUSH-TNF $\alpha$  assay. The cell was not treated with  
24 AP21967. Arrows indicate the budding of a tubular transport intermediate. The scale  
25 bar represents 1  $\mu\text{m}$ . **(i)** Quantification of RUSH-TNF $\alpha$  and SEC16A intensities over  
26 time (normalized to their respective max intensities) in the ERES tracked in (h). **(j)**  
27 Selected frames of a representative timelapse recording of an AP-induced mNG-  
28 ERES coagg during RUSH-TNF $\alpha$  assay. Arrows indicate the budding of tubular  
29 transport intermediates. The scale bar represents 1  $\mu\text{m}$ . **(k)** Quantification of RUSH-  
30 TNF $\alpha$  and SEC16A intensities over time (normalized to their respective max intensities)  
31 in the mNG-ERES tracked in (j).

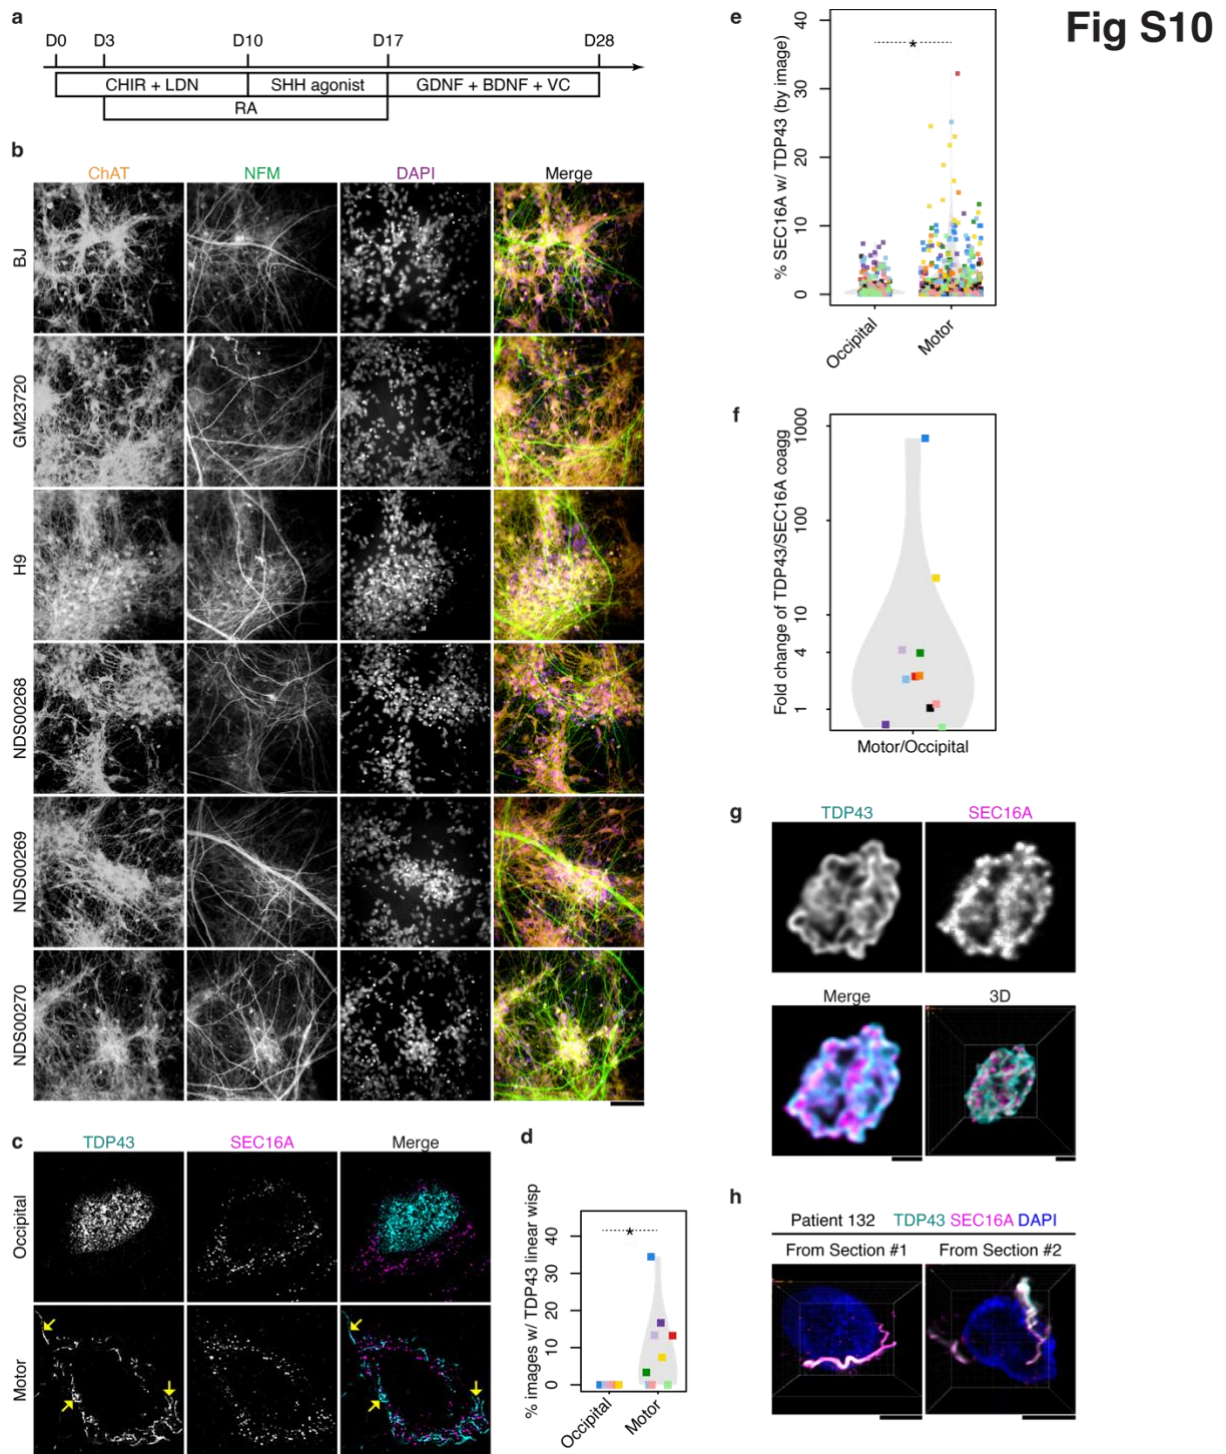

**Fig S10**

1

2 **Supplementary Fig. 10. Neurons derived from stem cells or in postmortem**  
 3 **brain sections of ALS patients.**

4 (a) Workflow of induced motor neuron (iMN) production from hESC/hiPSC. CHIR:  
 5 CHIR99021; LDN: LDN193189; RA: retinoic acid; SHH: Sonic Hedgehog. VC: Vitamin  
 6 C (L-ascorbic acid). D0: Day 0 of induced differentiation. (b) Representative images  
 7 of the immunofluorescence staining of (cholinergic) neuronal markers ChAT and NFM

1 in iMNs derived from non-ALS (BJ, GM23720 and H9) and ALS patient (NDS00268,  
2 NDS00269 and NDS00270) hESC/hiPSCs. Each scale bar represents 50  $\mu\text{m}$ . **(c)**  
3 Representative images of the immunofluorescence staining of TDP43 and SEC16A in  
4 the post-mortem sections of the occipital cortex and motor cortex from the same ALS  
5 patient. Like Fig. 7c, e but showing the presence of TDP43 linear wisps (fibril-like  
6 aggregates indicated by arrows) in the motor neurons. The scale bar represents 5  $\mu\text{m}$ .  
7 **(d)** Quantification of the experiments as in (c) comparing the percentage of images  
8 containing TDP43 linear wisps in the occipital versus motor cortex of 11 different ALS  
9 patients (color-coded).  $n = 330$  z-stacks each taken from the occipital and motor cortex  
10 of 11 patients. The values of individual patients are plotted as dots. The asterisk stands  
11 for significant ( $p\text{-value} \leq 0.05$ ) in two-sided t-test. **(e)** Quantification of the experiments  
12 as in Fig. 7c showing the volume percentage of SEC16A inclusions containing TDP43  
13 in the occipital cortex versus motor cortex of 11 different ALS patients (color-coded).  
14 Similar to Fig. 7d but each dot represents the percentage in one z-stack image (color  
15 coded by patient).  $n = 330$  z-stacks each taken from the occipital and motor cortex of  
16 11 patients. The asterisk stands for significant ( $p\text{-value} \leq 0.05$ ) in two-sided t-test. **(f)**  
17 Paired analysis of TDP43/SEC16A coagg fold change comparing motor versus  
18 occipital cortex for 11 different ALS patients (color-coded).  $n = 330$  z-stacks each  
19 taken from the occipital and motor cortex of 11 patients. Each dot represents the  
20 motor/occipital ratio of coagg levels of a patient, plotted on a  $\log_{10}$  scale. **(g)** Zoom-in  
21 views of the curled TDP43/SEC16A skein in Fig. 7e marked by the arrowhead. Each  
22 scale bar represents 1  $\mu\text{m}$ . **(h)** Similar to Fig. 7i, but showing more representative  
23 images of intracellular TDP43/SEC16A skein-like aggregates found in the motor  
24 cortex of sALS Patient 132. Each scale bar represents 5  $\mu\text{m}$ .
