# Supplementary material for: TDP43 aggregation at ER-exit sites impairs ER-to-Golgi transport
Source: PubMed Central journal article supplement — Nat Commun. 2024 Oct 19;15:9026. doi: 10.1038/s41467-024-52706-7 (PMC11489672; doi:10.1038/s41467-024-52706-7), 2024-10-19
Supplement: 41467_2024_52706_MOESM20_ESM.pdf [file 41467_2024_52706_MOESM20_ESM.pdf]

## Reporting Summary

Nature Portfolio wishes to improve the reproducibility of the work that we publish. This form provides structure for consistency and transparency in reporting. For further information on Nature Portfolio policies, see our [Editorial Policies](#) and the [Editorial Policy Checklist](#).

### Statistics

For all statistical analyses, confirm that the following items are present in the figure legend, table legend, main text, or Methods section.

- | n/a                      | Confirmed                                                                                                                                                                                                                                                                                      |
|--------------------------|------------------------------------------------------------------------------------------------------------------------------------------------------------------------------------------------------------------------------------------------------------------------------------------------|
| <input type="checkbox"/> | <input checked="" type="checkbox"/> The exact sample size ( $n$ ) for each experimental group/condition, given as a discrete number and unit of measurement                                                                                                                                    |
| <input type="checkbox"/> | <input checked="" type="checkbox"/> A statement on whether measurements were taken from distinct samples or whether the same sample was measured repeatedly                                                                                                                                    |
| <input type="checkbox"/> | <input checked="" type="checkbox"/> The statistical test(s) used AND whether they are one- or two-sided<br><i>Only common tests should be described solely by name; describe more complex techniques in the Methods section.</i>                                                               |
| <input type="checkbox"/> | <input checked="" type="checkbox"/> A description of all covariates tested                                                                                                                                                                                                                     |
| <input type="checkbox"/> | <input checked="" type="checkbox"/> A description of any assumptions or corrections, such as tests of normality and adjustment for multiple comparisons                                                                                                                                        |
| <input type="checkbox"/> | <input checked="" type="checkbox"/> A full description of the statistical parameters including central tendency (e.g. means) or other basic estimates (e.g. regression coefficient) AND variation (e.g. standard deviation) or associated estimates of uncertainty (e.g. confidence intervals) |
| <input type="checkbox"/> | <input checked="" type="checkbox"/> For null hypothesis testing, the test statistic (e.g. $F$ , $t$ , $r$ ) with confidence intervals, effect sizes, degrees of freedom and $P$ value noted<br><i>Give <math>P</math> values as exact values whenever suitable.</i>                            |
| <input type="checkbox"/> | <input checked="" type="checkbox"/> For Bayesian analysis, information on the choice of priors and Markov chain Monte Carlo settings                                                                                                                                                           |
| <input type="checkbox"/> | <input checked="" type="checkbox"/> For hierarchical and complex designs, identification of the appropriate level for tests and full reporting of outcomes                                                                                                                                     |
| <input type="checkbox"/> | <input checked="" type="checkbox"/> Estimates of effect sizes (e.g. Cohen's $d$ , Pearson's $r$ ), indicating how they were calculated                                                                                                                                                         |

*Our web collection on [statistics for biologists](#) contains articles on many of the points above.*

### Software and code

Policy information about [availability of computer code](#)

Data collection

Data analysis

For manuscripts utilizing custom algorithms or software that are central to the research but not yet described in published literature, software must be made available to editors and reviewers. We strongly encourage code deposition in a community repository (e.g. GitHub). See the Nature Portfolio [guidelines for submitting code & software](#) for further information.

### Data

Policy information about [availability of data](#)

All manuscripts must include a [data availability statement](#). This statement should provide the following information, where applicable:

- Accession codes, unique identifiers, or web links for publicly available datasets
- A description of any restrictions on data availability
- For clinical datasets or third party data, please ensure that the statement adheres to our [policy](#)

MS proteomics data have been deposited to the Japan ProteOme SStandard Repository (jPOSTrepo) under identifier 9443. Plasmids generated in this study and their maps and sequences will be submitted to Addgene and also available on request.

## Research involving human participants, their data, or biological material

Policy information about studies with [human participants or human data](#). See also policy information about [sex, gender \(identity/presentation\), and sexual orientation](#) and [race, ethnicity and racism](#).

|                                                                    |                 |
|--------------------------------------------------------------------|-----------------|
| Reporting on sex and gender                                        | Not applicable. |
| Reporting on race, ethnicity, or other socially relevant groupings | Not applicable. |
| Population characteristics                                         | Not applicable. |
| Recruitment                                                        | Not applicable. |
| Ethics oversight                                                   | Not applicable. |

Note that full information on the approval of the study protocol must also be provided in the manuscript.

## Field-specific reporting

Please select the one below that is the best fit for your research. If you are not sure, read the appropriate sections before making your selection.

Life sciences  Behavioural & social sciences  Ecological, evolutionary & environmental sciences

For a reference copy of the document with all sections, see [nature.com/documents/nr-reporting-summary-flat.pdf](https://www.nature.com/documents/nr-reporting-summary-flat.pdf)

## Life sciences study design

All studies must disclose on these points even when the disclosure is negative.

|                 |                                                                                                                                                                                                                                                                                                                                                                                                                                                                                                                                                                               |
|-----------------|-------------------------------------------------------------------------------------------------------------------------------------------------------------------------------------------------------------------------------------------------------------------------------------------------------------------------------------------------------------------------------------------------------------------------------------------------------------------------------------------------------------------------------------------------------------------------------|
| Sample size     | The sample sizes were stated for each figure. Usually, for experiments using RPE-1/HEK293T cell lines, 3 replicate experiments were performed on different days with > 15 cells imaged in each experiment; for experiments using hESC/hiPSC-derived motor neurons (iMNs), 3 ALS patient and 3 non-ALS (control) individuals were included, with > 30 iMNs imaged for each individual; for experiments using postmortem brain biopsies, the (ALS-affected) motor cortices and (control) occipital cortices of 3 ALS patients were analyzed, with > 30 neurons imaged for each. |
| Data exclusions | No data exclusion was performed.                                                                                                                                                                                                                                                                                                                                                                                                                                                                                                                                              |
| Replication     | For experiments using RPE-1/HEK293T cell lines, 3 replicate experiments were performed on different days; for experiments using hESC/hiPSC-derived motor neurons (iMNs), 3 ALS patient and 3 non-ALS (control) individuals were included; for experiments using postmortem brain biopsies, the (ALS-affected) motor cortices and (control) occipital cortices of 3 ALS patients were analyzed.                                                                                                                                                                                |
| Randomization   | Wherever possible, experiments of control and different treatment groups were performed together. Alternatively, the grouping of samples was random.                                                                                                                                                                                                                                                                                                                                                                                                                          |
| Blinding        | Analysis of ALS patient postmortem sections was performed in double-blinded manner. Briefly, the identities of these samples were blinded by Lyle Ostrow Lab and then stained and imaged by Rong Li Lab.                                                                                                                                                                                                                                                                                                                                                                      |

## Reporting for specific materials, systems and methods

We require information from authors about some types of materials, experimental systems and methods used in many studies. Here, indicate whether each material, system or method listed is relevant to your study. If you are not sure if a list item applies to your research, read the appropriate section before selecting a response.

### Materials & experimental systems

| n/a                                 | Involvement in the study                                  |
|-------------------------------------|-----------------------------------------------------------|
| <input type="checkbox"/>            | <input checked="" type="checkbox"/> Antibodies            |
| <input type="checkbox"/>            | <input checked="" type="checkbox"/> Eukaryotic cell lines |
| <input checked="" type="checkbox"/> | <input type="checkbox"/> Palaeontology and archaeology    |
| <input checked="" type="checkbox"/> | <input type="checkbox"/> Animals and other organisms      |
| <input checked="" type="checkbox"/> | <input type="checkbox"/> Clinical data                    |
| <input checked="" type="checkbox"/> | <input type="checkbox"/> Dual use research of concern     |
| <input checked="" type="checkbox"/> | <input type="checkbox"/> Plants                           |

### Methods

| n/a                                 | Involvement in the study                        |
|-------------------------------------|-------------------------------------------------|
| <input checked="" type="checkbox"/> | <input type="checkbox"/> ChIP-seq               |
| <input checked="" type="checkbox"/> | <input type="checkbox"/> Flow cytometry         |
| <input checked="" type="checkbox"/> | <input type="checkbox"/> MRI-based neuroimaging |

## Antibodies

|                 |                                                                                                                                                                                                                                                                                                                                                                                                                                                                                                                                                                                           |
|-----------------|-------------------------------------------------------------------------------------------------------------------------------------------------------------------------------------------------------------------------------------------------------------------------------------------------------------------------------------------------------------------------------------------------------------------------------------------------------------------------------------------------------------------------------------------------------------------------------------------|
| Antibodies used | Antibodies used in this study are listed in Table S2.                                                                                                                                                                                                                                                                                                                                                                                                                                                                                                                                     |
| Validation      | TDP43, G3BP and CRT antibodies (Abcam 3H8, Abcam EPR13986(B), Abcam EPR3924) were Knock-out (KO) validated by manufacturers. SEC16A antibody (Sigma HPA005684) was validated by Human Protein Atlas (HPA) based on subcellular localization in immunofluorescence (IF) staining, correlation between stain/band intensities and RNA expression, and protein array of 384 different antigens including SEC16A. SEC24 antibody (Sigma HPA040196) was validated by manufacturers and HPA based on subcellular localization in IF, protein array result, and correlation with RNA expression. |

## Eukaryotic cell lines

Policy information about [cell lines and Sex and Gender in Research](#)

|                                                                   |                                                                                                                                                                                                                                                                                                                                                                                                                                                                                                                                              |
|-------------------------------------------------------------------|----------------------------------------------------------------------------------------------------------------------------------------------------------------------------------------------------------------------------------------------------------------------------------------------------------------------------------------------------------------------------------------------------------------------------------------------------------------------------------------------------------------------------------------------|
| Cell line source(s)                                               | RPE-1 cell line (female) was acquired from a freezer stock in the lab, passed from what was originally purchased from ATCC. HEK293T cell line (female) was a kind gift from B.C. Low Lab. BJ hiPSC (male) was obtained from National Center for Global Health (Japan), GM23720 hiPSC (female) was obtained from the NIGMS Human Genetic Cell Repository, H9 hESC (female) was purchased from Corning, and ALS patient hiPSCs of NDS00268 (female), NDS00269 (male), NDS00270 (male) were obtained from NINDS Human Cell and Data Repository. |
| Authentication                                                    | RPE-1 and HEK293T cell lines were limited to within 20 passages with continuous surveillance on cell morphology. RPE-1 was additionally tested for Hygromycin B and puromycin resistance. The induction of motor neurons from stem cells were performed according to previous publications (Hor et al., 2018, Hor et al., 2021) and validated by immunofluorescence staining of motor neuron markers NFM and ChAT.                                                                                                                           |
| Mycoplasma contamination                                          | Mycoplasma tests were performed quarterly using MycoAlert PLUS Mycoplasma Detection Kit (Lonza) or EZ-PCR-Mycoplasma Test Kit (Biological Industries) to ensure the absence of Mycoplasma.                                                                                                                                                                                                                                                                                                                                                   |
| Commonly misidentified lines (See <a href="#">ICLAC</a> register) | Not applicable.                                                                                                                                                                                                                                                                                                                                                                                                                                                                                                                              |

## Plants

|                       |                 |
|-----------------------|-----------------|
| Seed stocks           | Not applicable. |
| Novel plant genotypes | Not applicable. |
| Authentication        | Not applicable. |
